# Supplementary material for: Carbon–metal versus metal–metal synergistic mechanism of ethylene electro-oxidation via electrolysis of water on TM2N6 sites in graphene
Source: Royal Society of Chemistry journal article supplement (doi:10.1039/d4sc03944k), 2024-01-01
Supplement: d4sc03944k1.pdf [file d4sc03944k1.pdf]

## Supporting Information for

### Carbon-metal versus Metal-metal Synergistic Mechanism of Ethylene Electro-oxidation via Electrolysis Water on $\text{TM}_2\text{N}_6$ sites in Graphene

Yun-Jie Chu,<sup>a</sup> Chang-Yan Zhu,<sup>a</sup> Chun-Guang Liu,<sup>b\*</sup> Yun Geng,<sup>a</sup> Zhong-Min Su<sup>c</sup> and  
Min Zhang<sup>a\*</sup>

<sup>a</sup>Institute of Functional Material Chemistry, Faculty of Chemistry, National & Local United Engineering Laboratory for Power Batteries, Northeast Normal University, Changchun 130024, China;

<sup>b</sup>Department of Chemistry, Faculty of Science, Beihua University, Jilin City 132013, P. R. China

<sup>c</sup>State Key Laboratory of Supramolecular Structure and Materials, Institute of Theoretical Chemistry, College of Chemistry, Jilin University, Changchun, 130021 P. R. China

Email: [liucg407@163.com](mailto:liucg407@163.com); [mzhang@nenu.edu.cn](mailto:mzhang@nenu.edu.cn)

## Table of contents

(Total Number of Pages: 24, Total Number of Figures: 18, Total Number of Tables: 3)

|                                                                                                                                                                                                                                                                                                |          |
|------------------------------------------------------------------------------------------------------------------------------------------------------------------------------------------------------------------------------------------------------------------------------------------------|----------|
| <b>Table S1.</b> Free energy difference ( $\Delta G$ , eV) of O atom adsorbed at difference sites for 19 $\text{TM}_2\text{N}_6@$ graphenes, the “0 eV” represents the most stable O adsorption site, and “-” represents no corresponding configurations obtained during their optimization.   | Page S4  |
| <b>Table S2.</b> Total Gibbs free energy changes of ethylene oxidation reaction initiated by stable *O intermediates to AA and EO on various $\text{TM}_2\text{N}_6@$ graphenes.                                                                                                               | Page S5  |
| <b>Table S3.</b> Gibbs free energy difference ( $\Delta G$ , eV) of OH adsorbed at difference sites on 12 $\text{TM}_2\text{N}_6@$ graphenes, the “0 eV” represents the most stable OH adsorption site, and “-” represents no corresponding configurations obtained during their optimization. | Page S6  |
| <b>Fig. S1</b> Top and side views of various homonuclear $\text{TM}_2\text{N}_6@$ graphene DMACs with distances between two metal atoms in angstroms ( $\text{\AA}$ ).                                                                                                                         | Page S7  |
| <b>Fig. S2</b> Top and side views of O atom adsorbed at the <b>site-1</b> on various $\text{TM}_2\text{N}_6@$ graphenes.                                                                                                                                                                       | Page S8  |
| <b>Fig. S3</b> Top and side views of O atom adsorbed at <b>site-2</b> on various $\text{TM}_2\text{N}_6@$ graphenes.                                                                                                                                                                           | Page S9  |
| <b>Fig. S4</b> Top and side views of O atom adsorbed at <b>site-3</b> on various $\text{TM}_2\text{N}_6@$ graphenes.                                                                                                                                                                           | Page S10 |
| <b>Fig. S5</b> Top and side views of O atom adsorbed at <b>site-4</b> on various $\text{TM}_2\text{N}_6@$ graphenes.                                                                                                                                                                           | Page S11 |
| <b>Fig. S6</b> Top and side views of OH adsorbed at <b>site-1</b> on various $\text{TM}_2\text{N}_6@$ graphenes.                                                                                                                                                                               | Page S12 |
| <b>Fig. S7</b> Top and side views of OH adsorbed at <b>site-2</b> on various $\text{TM}_2\text{N}_6@$ graphenes.                                                                                                                                                                               | Page S13 |
| <b>Fig. S8</b> Top and side views of OH adsorbed at <b>site-4</b> on various $\text{TM}_2\text{N}_6@$ graphenes.                                                                                                                                                                               | Page S14 |
| <b>Fig. S9</b> Top and side views of OOH adsorbed on various $\text{TM}_2\text{N}_6@$ graphenes.                                                                                                                                                                                               | Page S15 |
| <b>Fig. S10</b> Top and side views of OO adsorbed on various $\text{TM}_2\text{N}_6@$ graphenes.                                                                                                                                                                                               | Page S16 |
| <b>Fig. S11</b> Gibbs free energy change diagrams for ethylene electro-oxidation on $\text{Co}_2\text{N}_6@$ graphenes at the lowest applied potential to generate *O intermediates at pH=0.                                                                                                   | Page S17 |
| <b>Fig. S12</b> Top and side views of acetaldehyde adsorbed on various $\text{TM}_2\text{N}_6@$ graphenes.                                                                                                                                                                                     | Page S18 |
| <b>Fig. S13</b> Top and side views of ethylene oxide adsorbed on various $\text{TM}_2\text{N}_6@$ graphenes.                                                                                                                                                                                   | Page S19 |
| <b>Fig. S14</b> Kinetic energy barriers and transition state structures of AA and EO generation through C-TM mechanism on $\text{Co}_2\text{N}_6@$ graphenes.                                                                                                                                  | Page S20 |

|                                                                                                                                                                                                                 |          |
|-----------------------------------------------------------------------------------------------------------------------------------------------------------------------------------------------------------------|----------|
| <b>Fig. S15</b> Projected density of states (PDOS) of the d orbitals of the two metals in $\text{TM}_2\text{N}_6@\text{graphenes}$ .                                                                            | Page S21 |
| <b>Fig. 16</b> Linear relationship between d-band center of metals in $\text{TM}_2\text{N}_6@\text{graphenes}$ and energy difference of the most stable OH adsorption sites between metal and C sites.          | Page S22 |
| <b>Fig. S17</b> Evolution of the total energy of 9 $\text{TM}_2\text{N}_6@\text{graphene}$ at 300 K, and the total times duration 10 ps. Snapshots of structures at the end of AIMD simulations are also shown. | Page S23 |
| <b>Fig. S18</b> Evolution of the total energy of 9 $\text{TM}_2\text{N}_6@\text{graphene}$ at 500 K, and the total times duration 10 ps. Snapshots of structures at the end of AIMD simulations are also shown. | Page S24 |

**Table S1.** Free energy difference ( $\Delta G$ , eV) of O atom adsorbed at difference sites for 19  $\text{TM}_2\text{N}_6$ @graphenes, the “0 eV” represents the most stable O adsorption site, and “-” represents no corresponding configurations obtained during their optimization.

| metal | site-1 | site-2 | site-3 | site-4 |
|-------|--------|--------|--------|--------|
| TiTi  | 0      | —      | 3.42   | —      |
| VV    | 0.17   | 0      | 4.21   | —      |
| CrCr  | 0.77   | 0      | 3.28   | 3.23   |
| MnMn  | 0.43   | 0      | 1.74   | 1.61   |
| FeFe  | 0      | 0.03   | 0.63   | 0.61   |
| CoCo  | 0.17   | 0.17   | 0.17   | 0      |
| NiNi  | 0.90   | 0.77   | 0.13   | 0      |
| CuCu  | 0.93   | 0.88   | 0.09   | 0      |
| ZnZn  | 0      | —      | 0.43   | 0.39   |
| MoMo  | 0.76   | 0      | 3.87   | —      |
| RuRu  | 0.44   | 0      | 1.23   | 1.20   |
| RhRh  | 1.11   | 0.50   | 0.23   | 0      |
| PdPd  | 1.20   | 0.84   | 0.09   | 0      |
| TaTa  | 0      | 0.18   | 4.39   | —      |
| WW    | 0.73   | 0      | 4.11   | —      |
| ReRe  | 0.92   | 0      | 2.65   | 2.61   |
| OsOs  | 1.56   | 0      | 1.48   | 1.43   |
| IrIr  | —      | 0.27   | 0.30   | 0      |
| PtPt  | 1.44   | 0.62   | 0.20   | 0      |

**Table S2.** Total Gibbs free energy changes of ethylene oxidation reaction initiated by stable \*O intermediates to AA and EO on various TM<sub>2</sub>N<sub>6</sub>@graphenes.

|                      |       |       |       |       |       |
|----------------------|-------|-------|-------|-------|-------|
| metal type           | Ti    | V     | Cr    | Mn    | Fe    |
| $\Delta G_{AA}$ (eV) | 0.88  | 2.25  | 0.78  | -0.98 | -2.18 |
| $\Delta G_{EO}$ (eV) | 2.09  | 3.46  | 1.99  | 0.23  | -0.97 |
| metal type           | Co    | Ni    | Cu    | Zn    | Mo    |
| $\Delta G_{AA}$ (eV) | -2.80 | -2.95 | -2.65 | -2.01 | 1.67  |
| $\Delta G_{EO}$ (eV) | -1.60 | -1.74 | -1.44 | -0.80 | 2.88  |
| metal type           | Ru    | Rh    | Pd    | Ta    | W     |
| $\Delta G_{AA}$ (eV) | -1.44 | -1.49 | -2.58 | 2.12  | 1.68  |
| $\Delta G_{EO}$ (eV) | -0.23 | -2.70 | -1.37 | 3.33  | 2.83  |
| metal type           | Re    | Os    | Ir    | Pt    |       |
| $\Delta G_{AA}$ (eV) | 0.32  | -1.08 | -2.51 | -2.32 |       |
| $\Delta G_{EO}$ (eV) | 1.53  | 0.13  | -1.31 | -1.11 |       |

**Table S3.** Gibbs free energy difference ( $\Delta G$ , eV) of OH adsorbed at difference sites on 12  $\text{TM}_2\text{N}_6$ @graphenes, the “0 eV” represents the most stable OH adsorption site, and “-” represents no corresponding configurations obtained during their optimization.

| metal | site-1 | site-2 | site-3 | site-4 |
|-------|--------|--------|--------|--------|
| MnMn  | —      | 0      | —      | 1.30   |
| FeFe  | 0.09   | 0      | —      | 0.66   |
| CoCo  | —      | 0      | —      | 0.48   |
| NiNi  | —      | 0      | —      | 0.19   |
| CuCu  | 0.02   | 0.02   | —      | 0      |
| ZnZn  | 0.09   | 0      | —      | 1.25   |
| RuRu  | 1.12   | 0      | —      | 1.21   |
| RhRh  | —      | 0      | —      | 0.18   |
| PdPd  | —      | 0.06   | —      | 0      |
| OsOs  | 1.54   | 0      | —      | 1.29   |
| IrIr  | —      | 0      | —      | 0.07   |
| PtPt  | —      | 0.16   | —      | 0      |

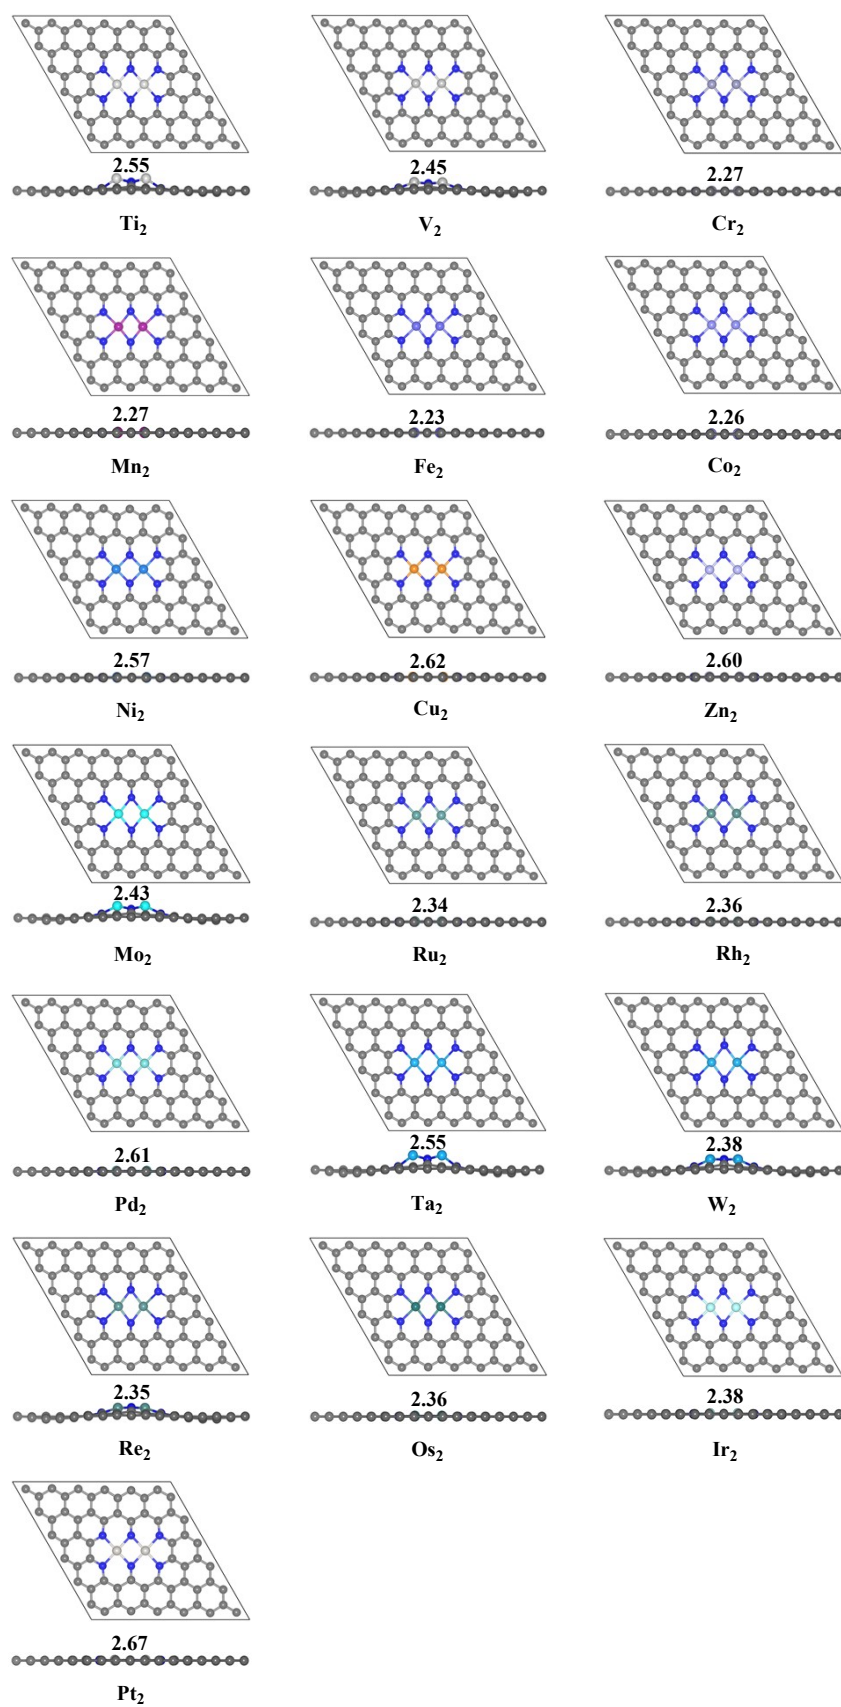

**Fig. S1** Top and side views of various homonuclear  $\text{TM}_2\text{N}_6@$ graphene DMACs with distances between two metal atoms in angstroms ( $\text{\AA}$ ).

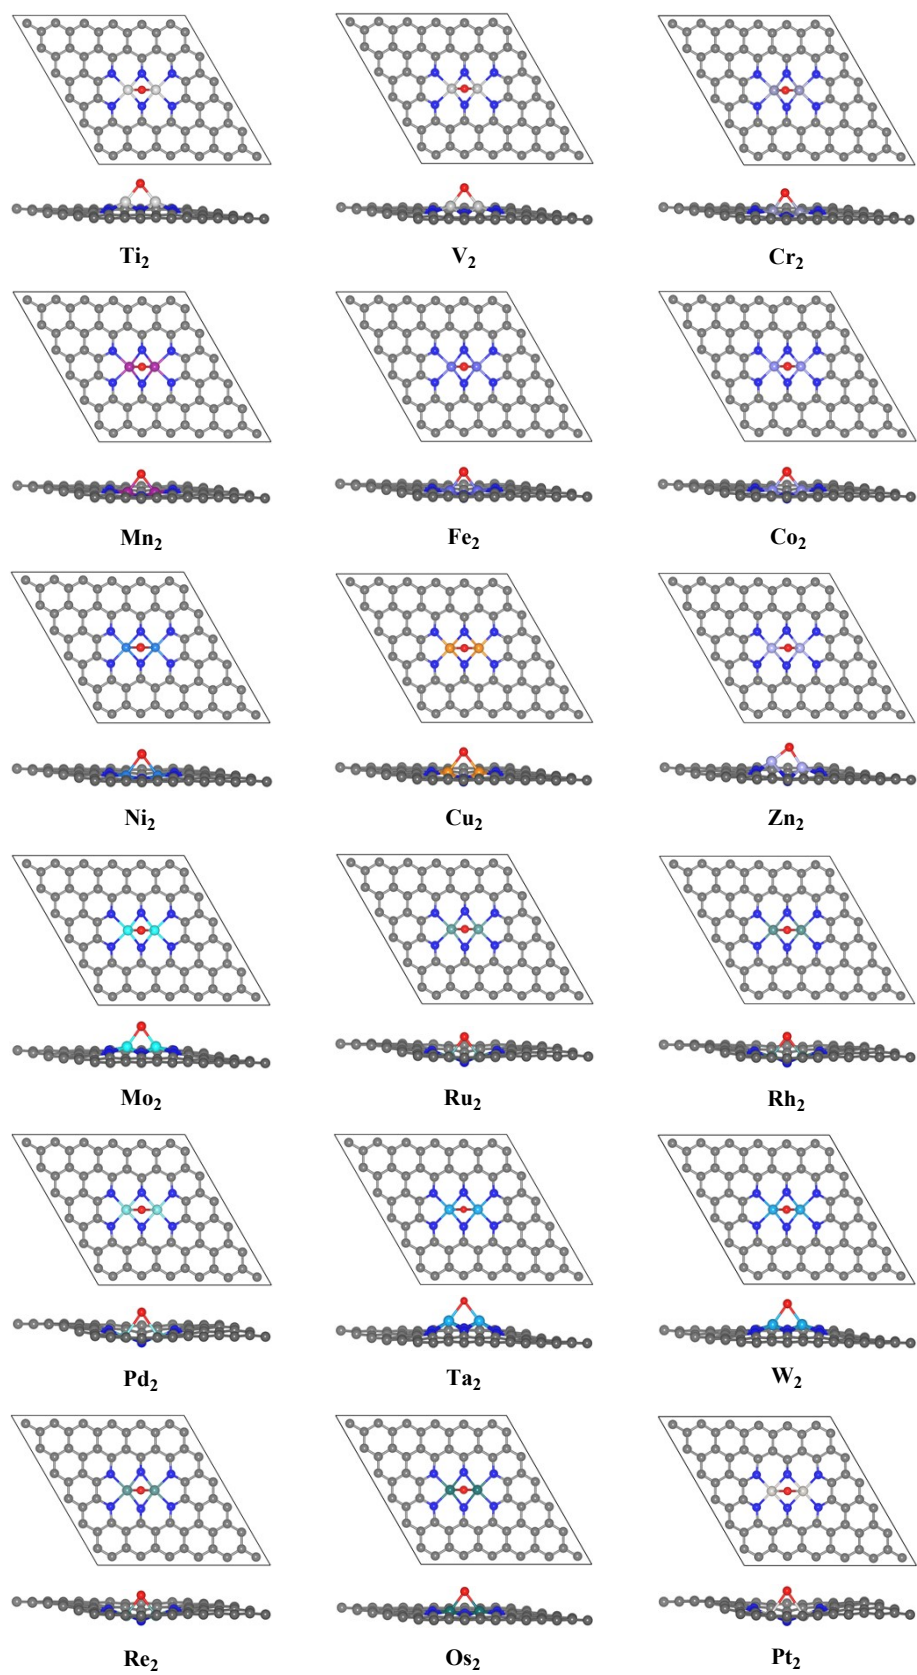

**Fig. S2** Top and side views of O atom absorbed at **site-1** on various  $\text{TM}_2\text{N}_6@$ graphenes.



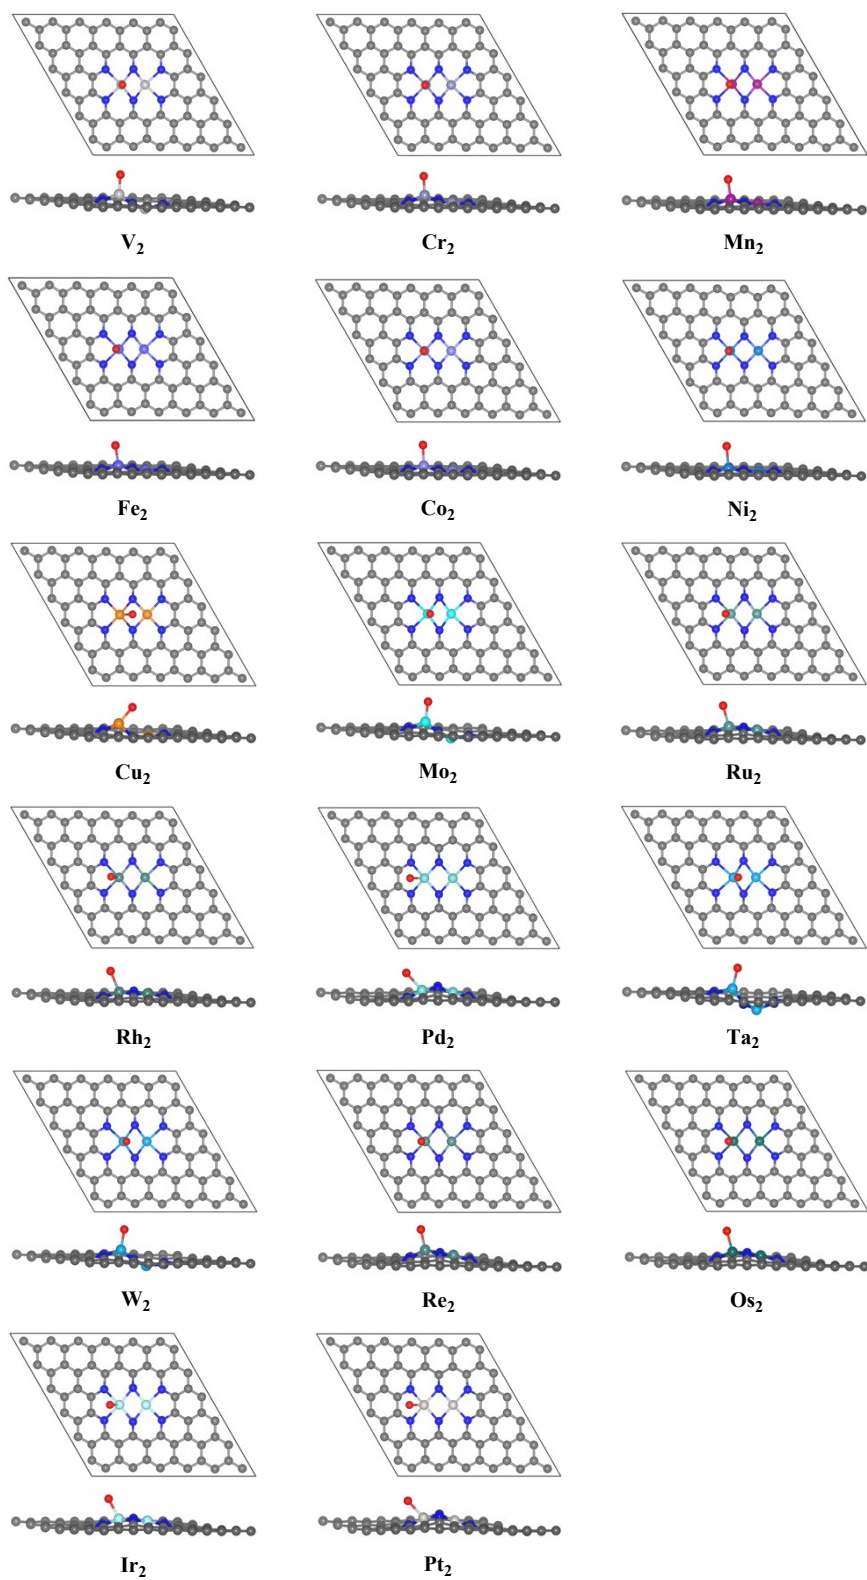

**Fig. S3** Top and side views of O atom absorbed at **site-2** on various  $\text{TM}_2\text{N}_6$ @graphenes.

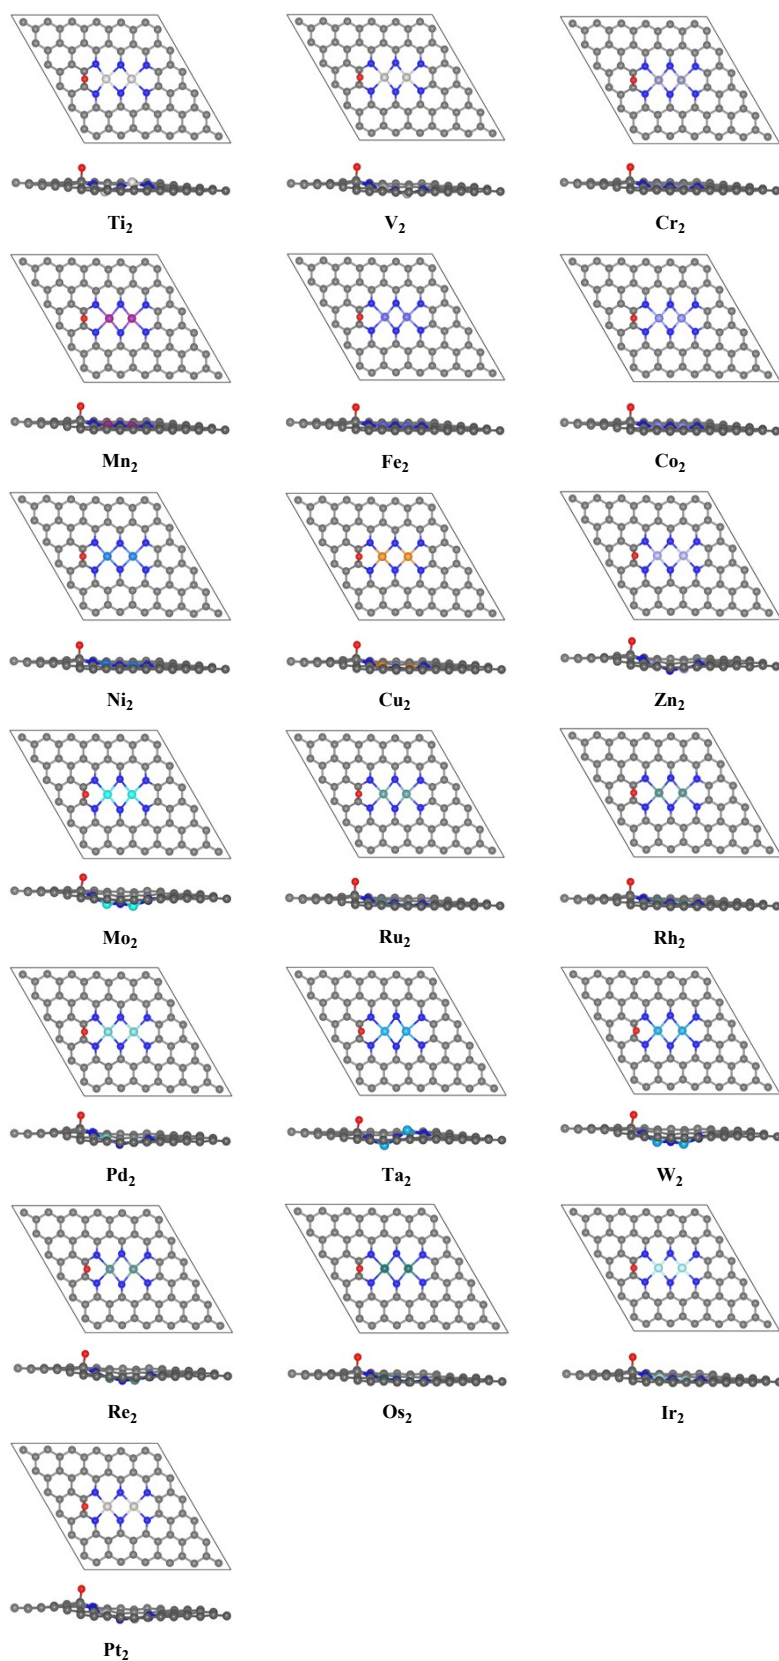

**Fig. S4** Top and side views of O atom absorbed at **site-3** on various TM<sub>2</sub>N<sub>6</sub>@graphenes.

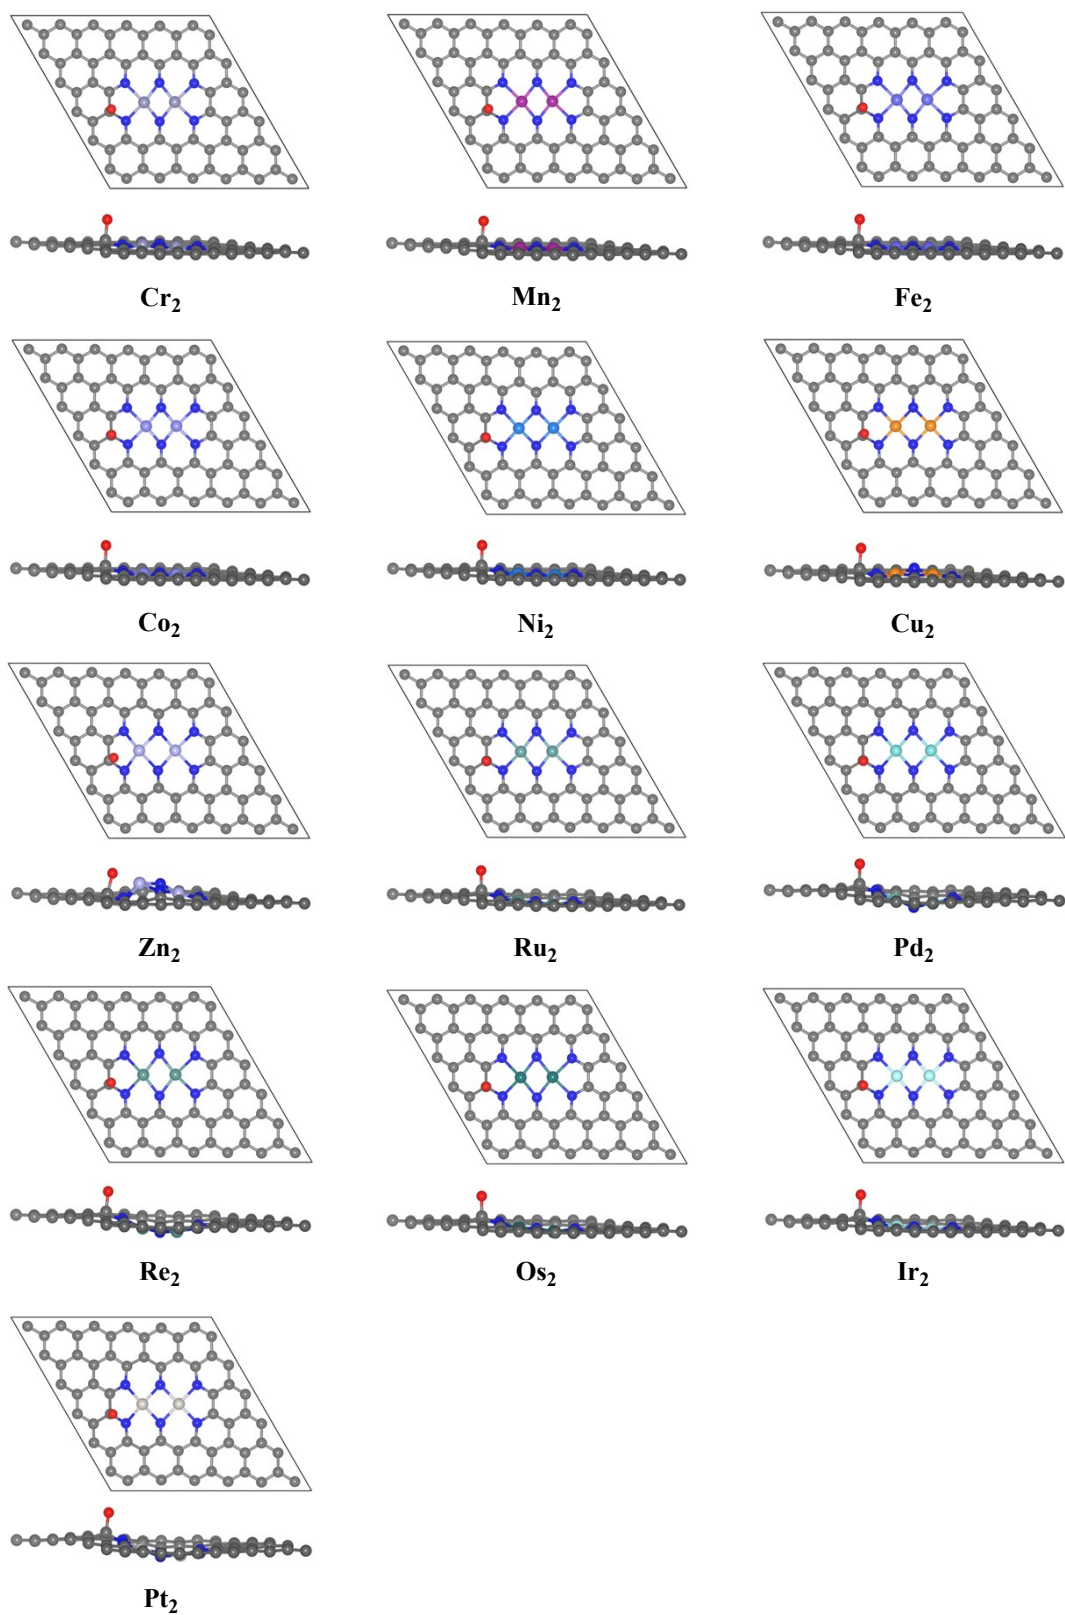

**Fig. S5** Top and side views of O atom absorbed at **site-4** on various TM<sub>2</sub>N<sub>6</sub>@graphenes.

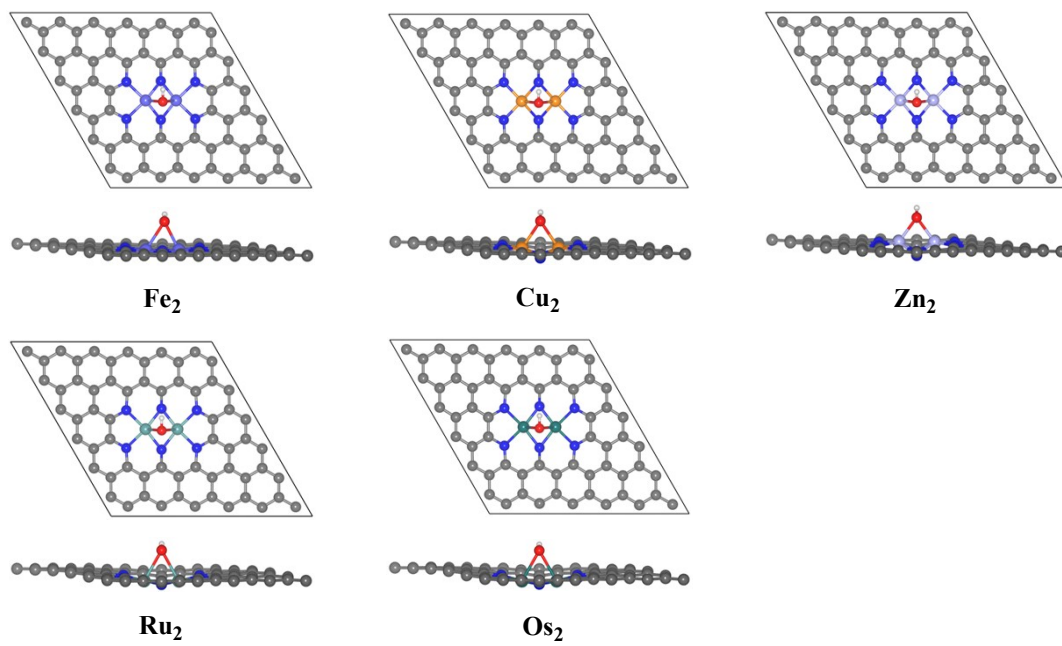

**Fig. S6** Top and side views of OH absorbed at **site-1** on various TM<sub>2</sub>N<sub>6</sub>@graphenes.

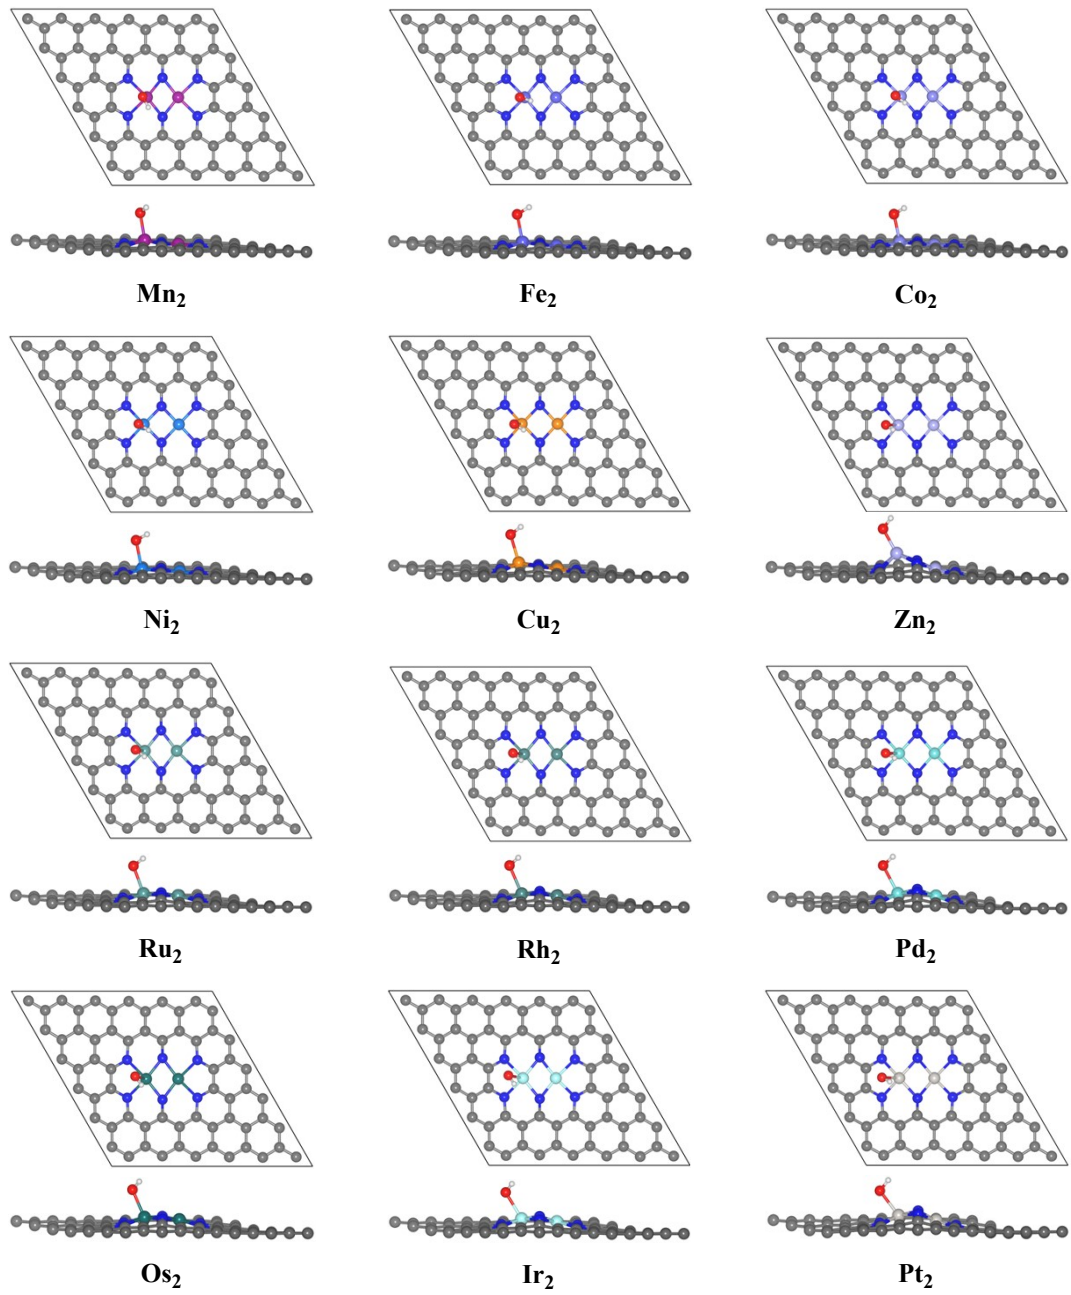

**Fig. S7** Top and side views of OH absorbed at **site-2** on various  $\text{TM}_2\text{N}_6@\text{graphenes}$ .

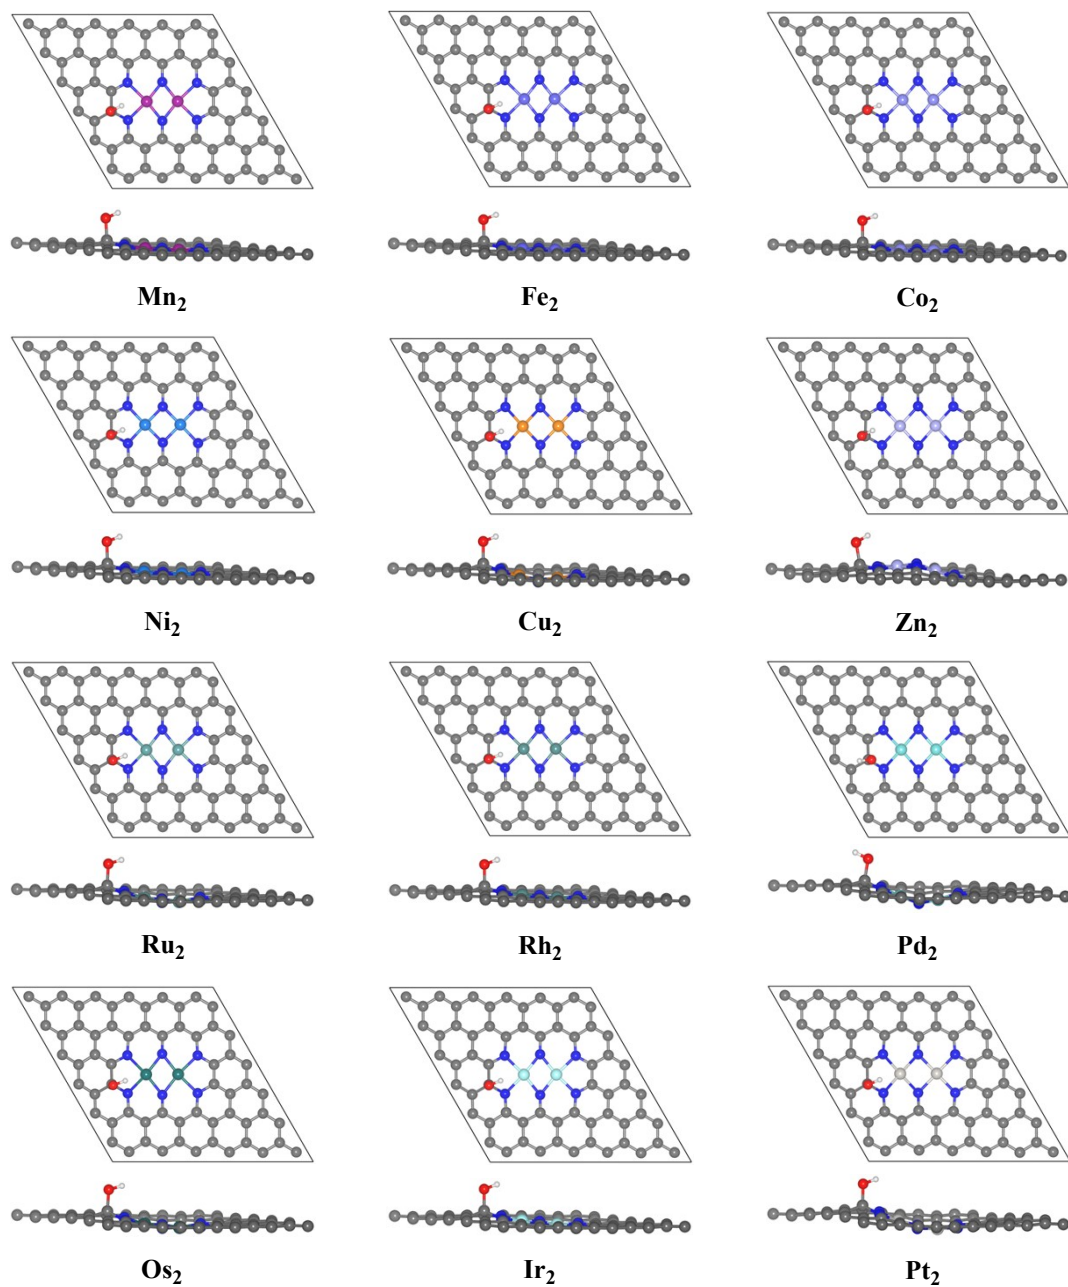

**Fig. S8** Top and side views of OH absorbed at **site-4** on various  $\text{TM}_2\text{N}_6@\text{graphenes}$ .

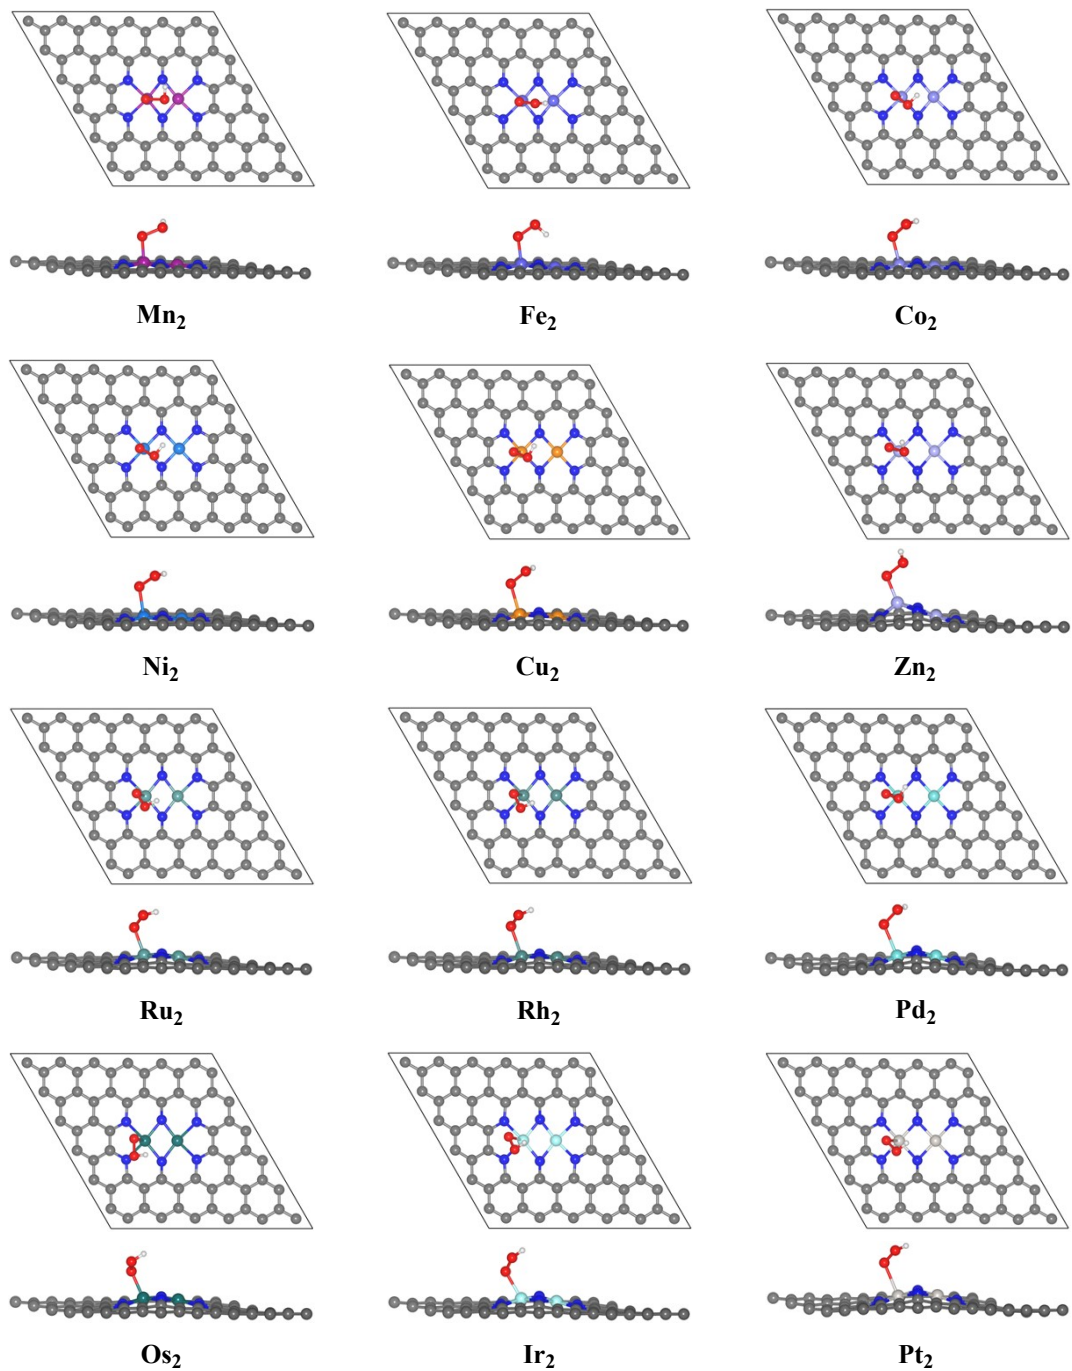

**Fig. S9** Top and side views of OOH absorbed on various TM<sub>2</sub>N<sub>6</sub>@graphenes.

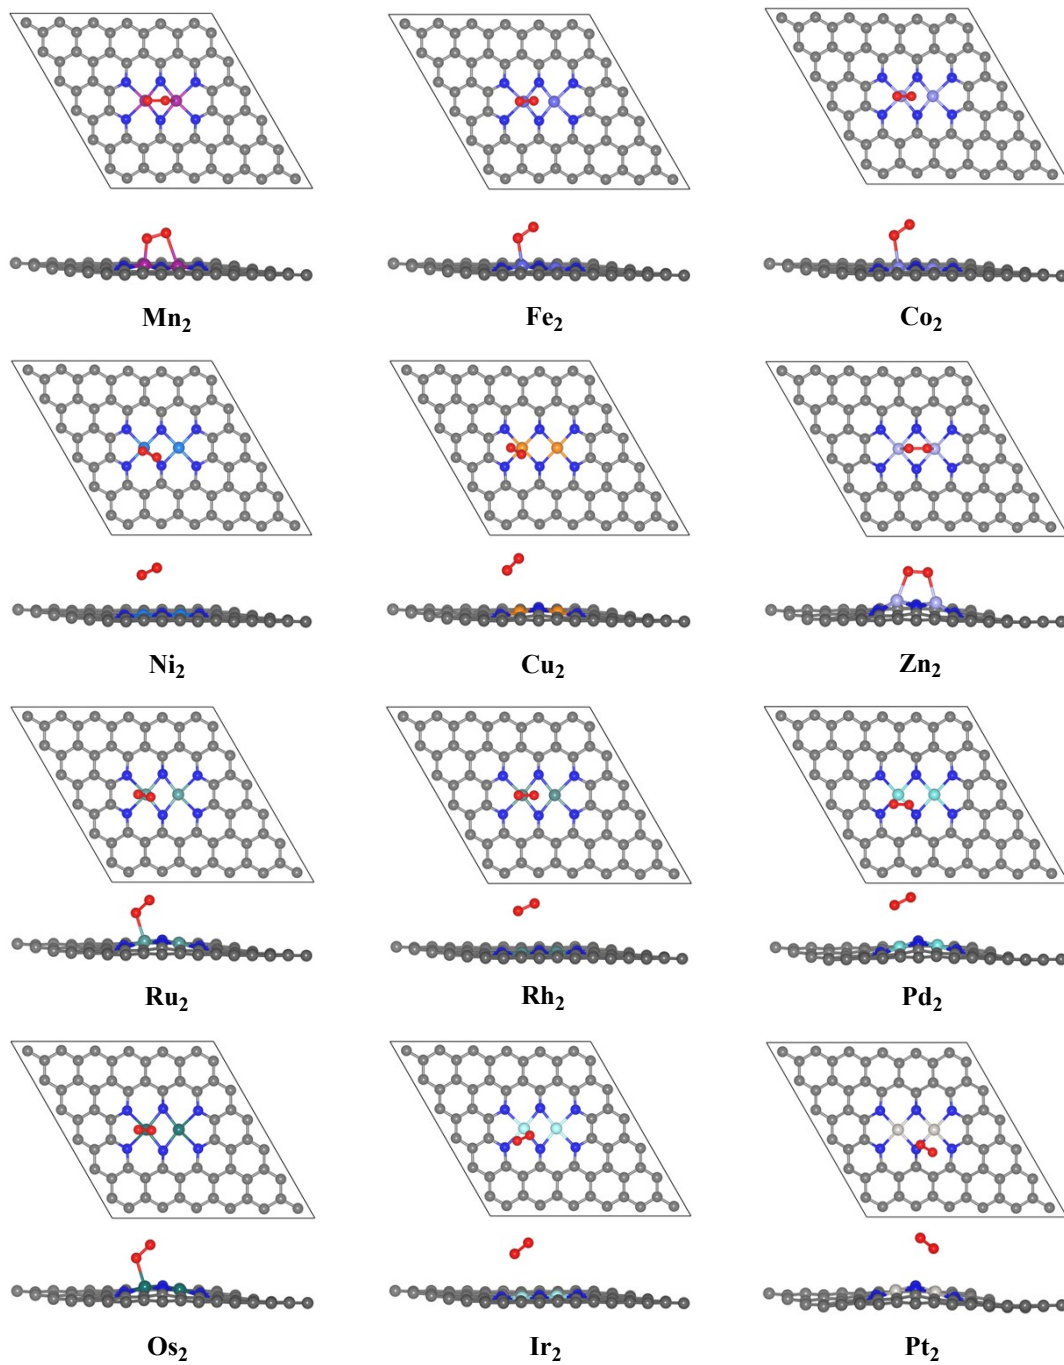

**Fig. S10** Top and side views of O<sub>2</sub> absorbed on various TM<sub>2</sub>N<sub>6</sub>@graphenes.



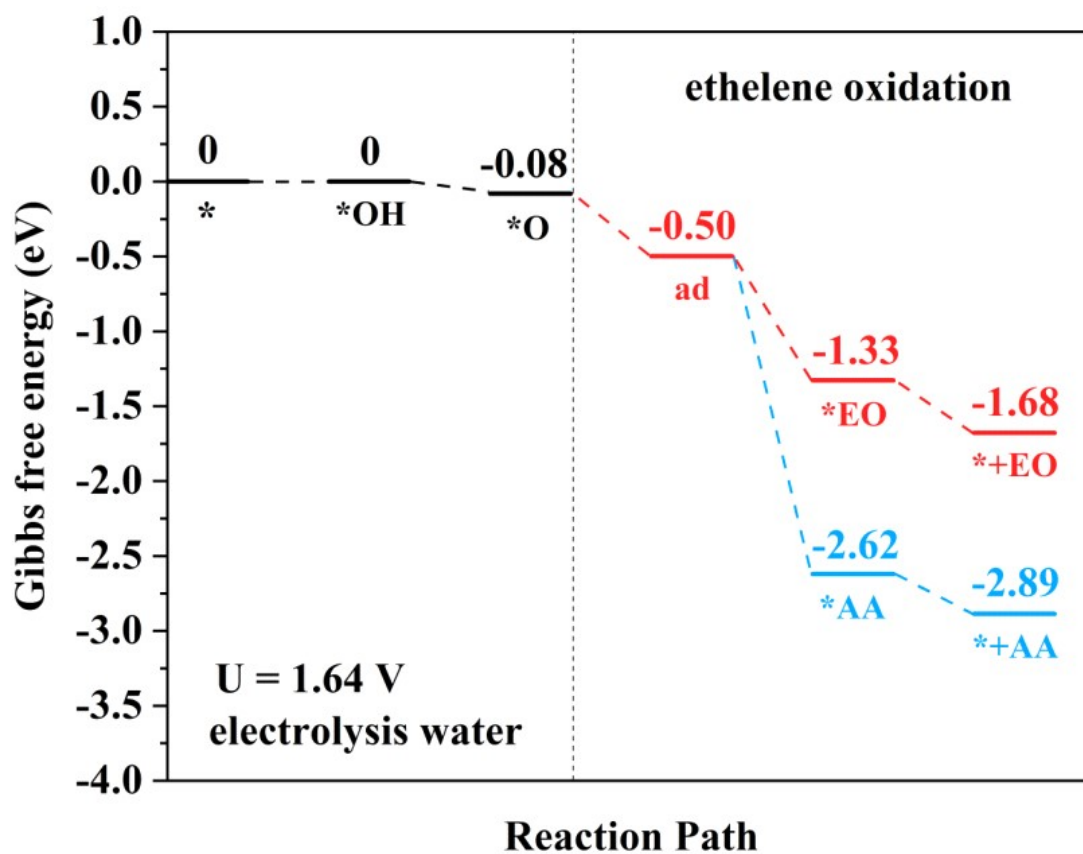

**Fig. S11** Gibbs free energy change diagrams for ethylene electro-oxidation on  $\text{Co}_2\text{N}_6@\text{graphenes}$  at the lowest applied potential to generate \*O intermediates at  $\text{pH}=0$ .

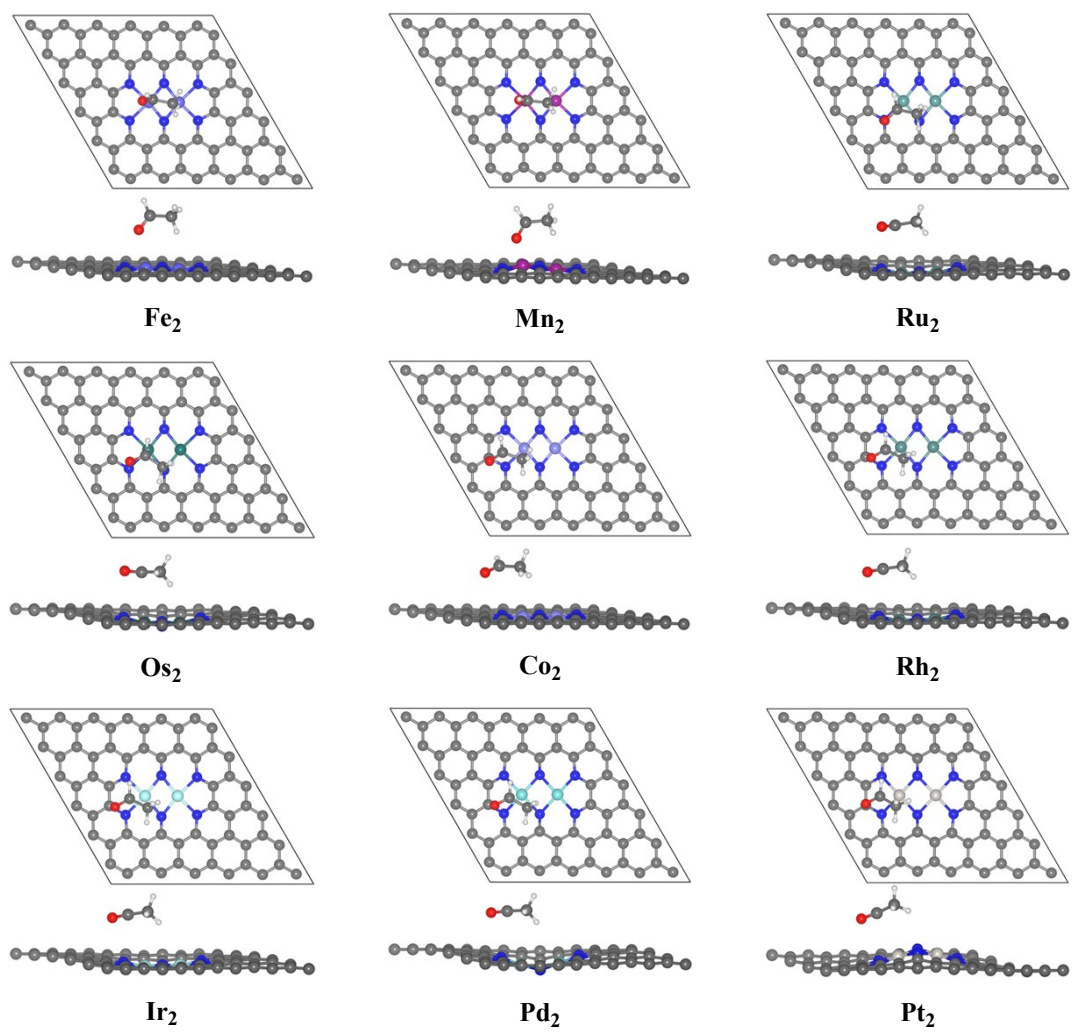

**Fig. S12** Top and side views of acetaldehyde absorbed on various  $TM_2N_6@graphenes$ .

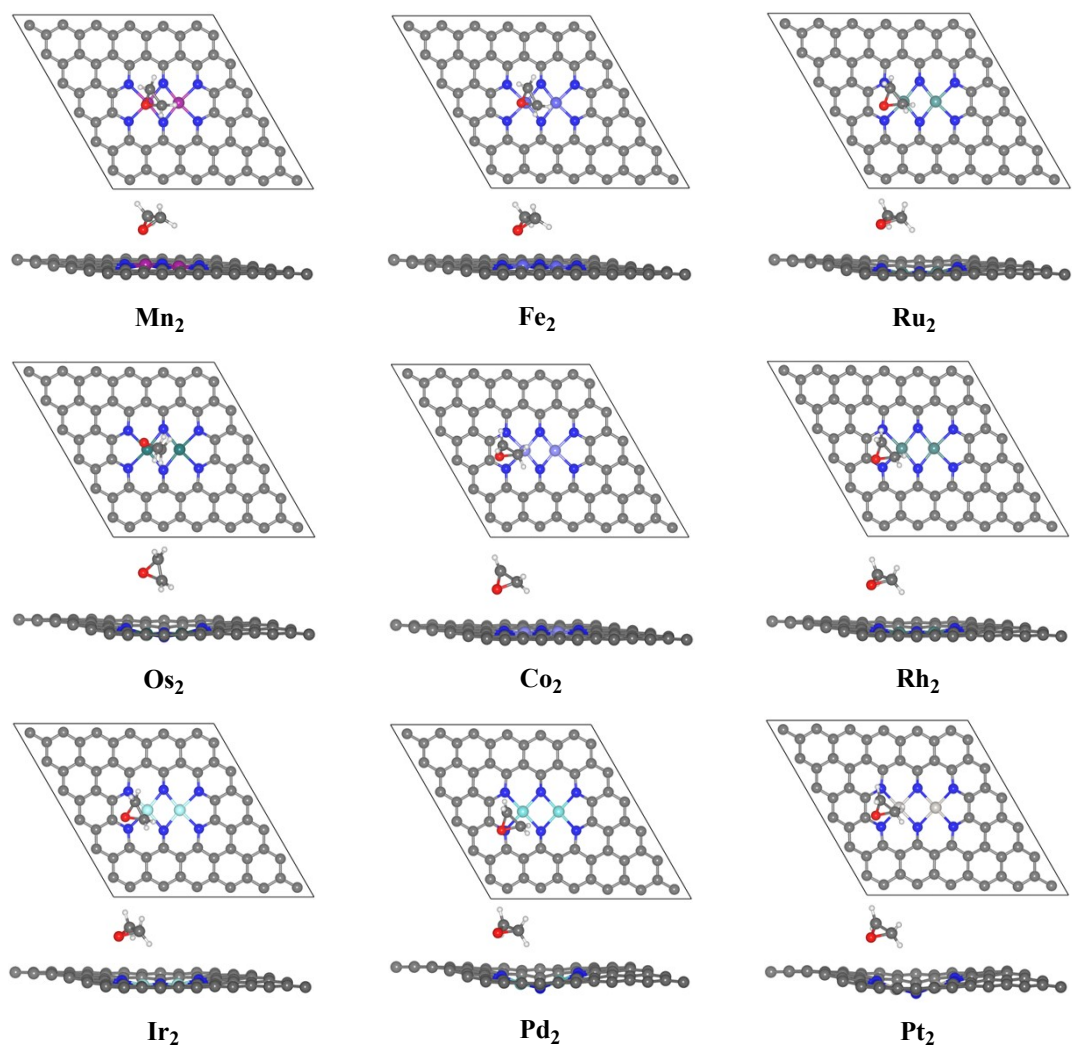

**Fig. S13** Top and side views of ethylene oxide absorbed on various  $\text{TM}_2\text{N}_6@$ graphenes.

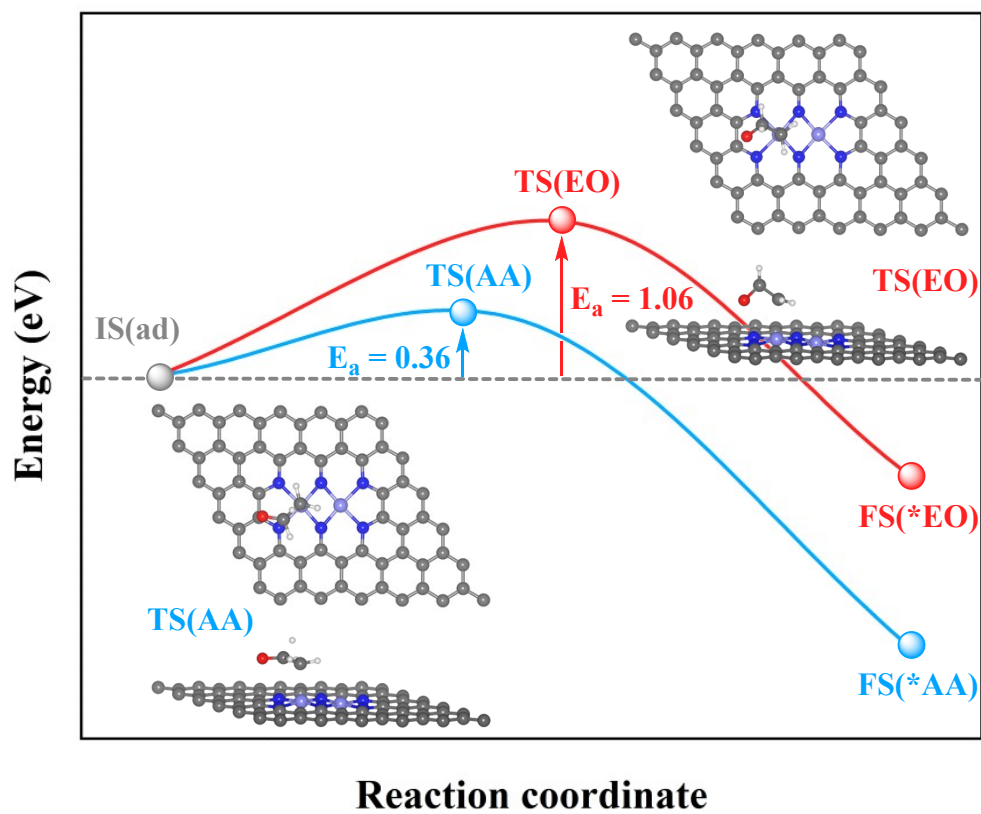

**Fig. S14** Kinetic energy barriers and transition state structures of AA and EO generation through C-TM mechanism on Co<sub>2</sub>N<sub>6</sub>@graphenes.

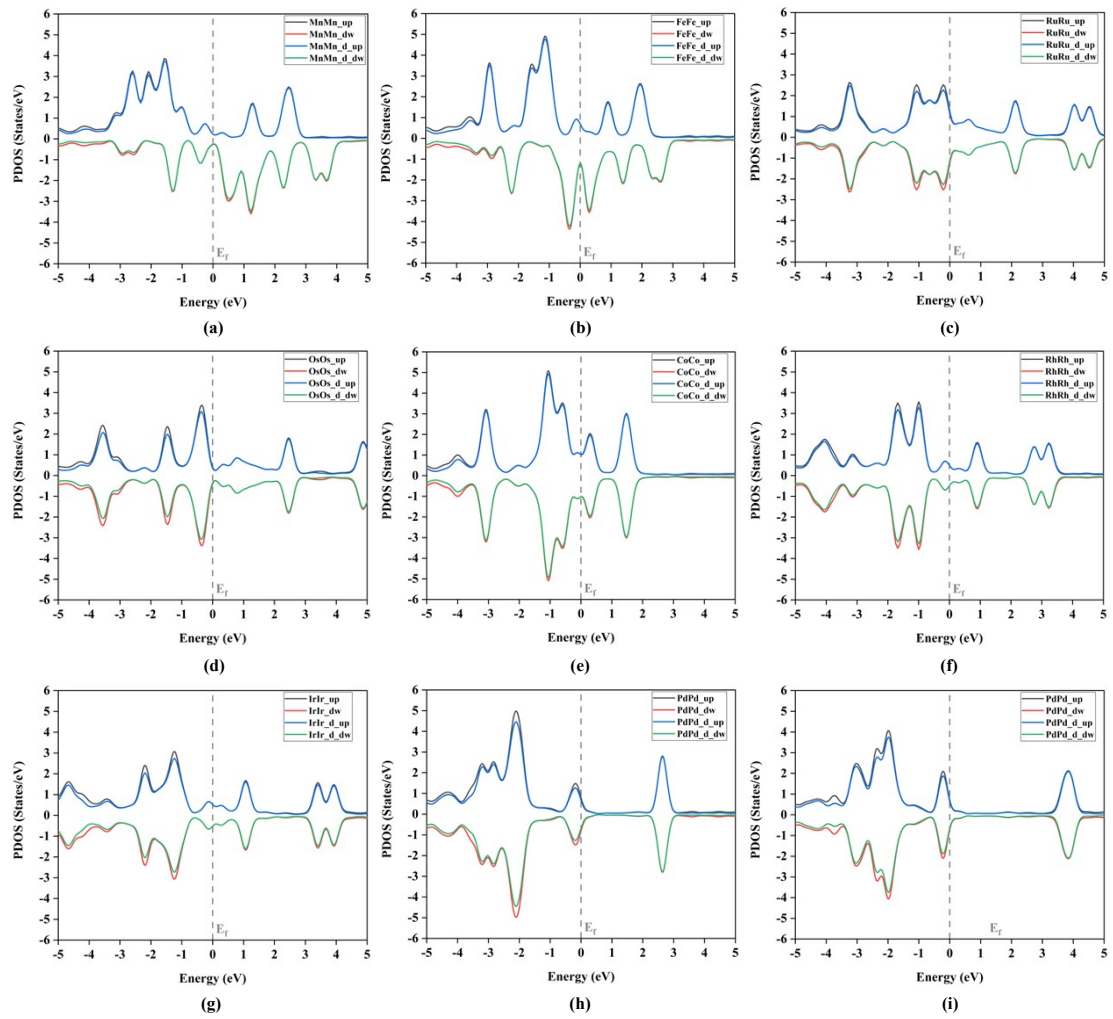

**Fig. S15** Projected density of states (PDOS) of the d orbitals of the two metals in  $\text{TM}_2\text{N}_6@$ graphenes.

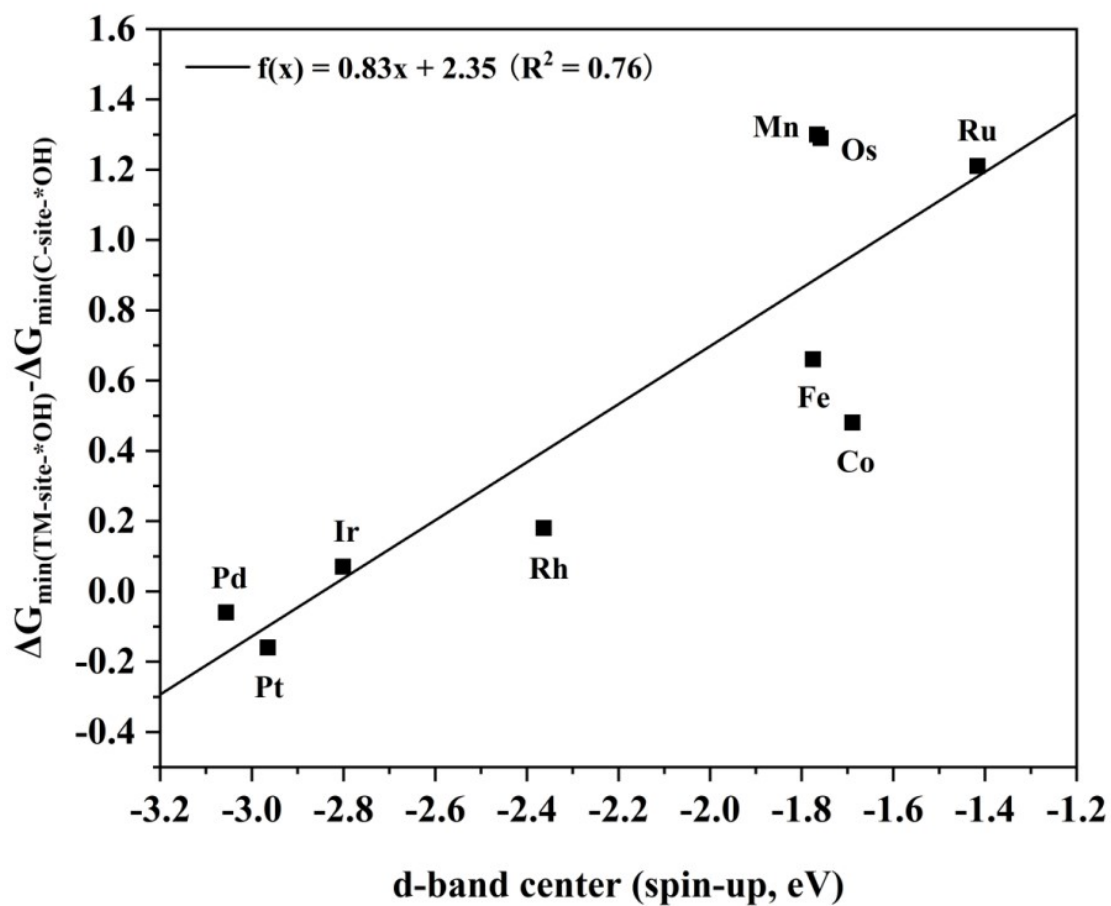

**Fig. S16** Linear relationship between d-band center of metals in  $\text{TM}_2\text{N}_6$ @graphenes and energy difference of the most stable OH adsorption sites between metal and C sites.

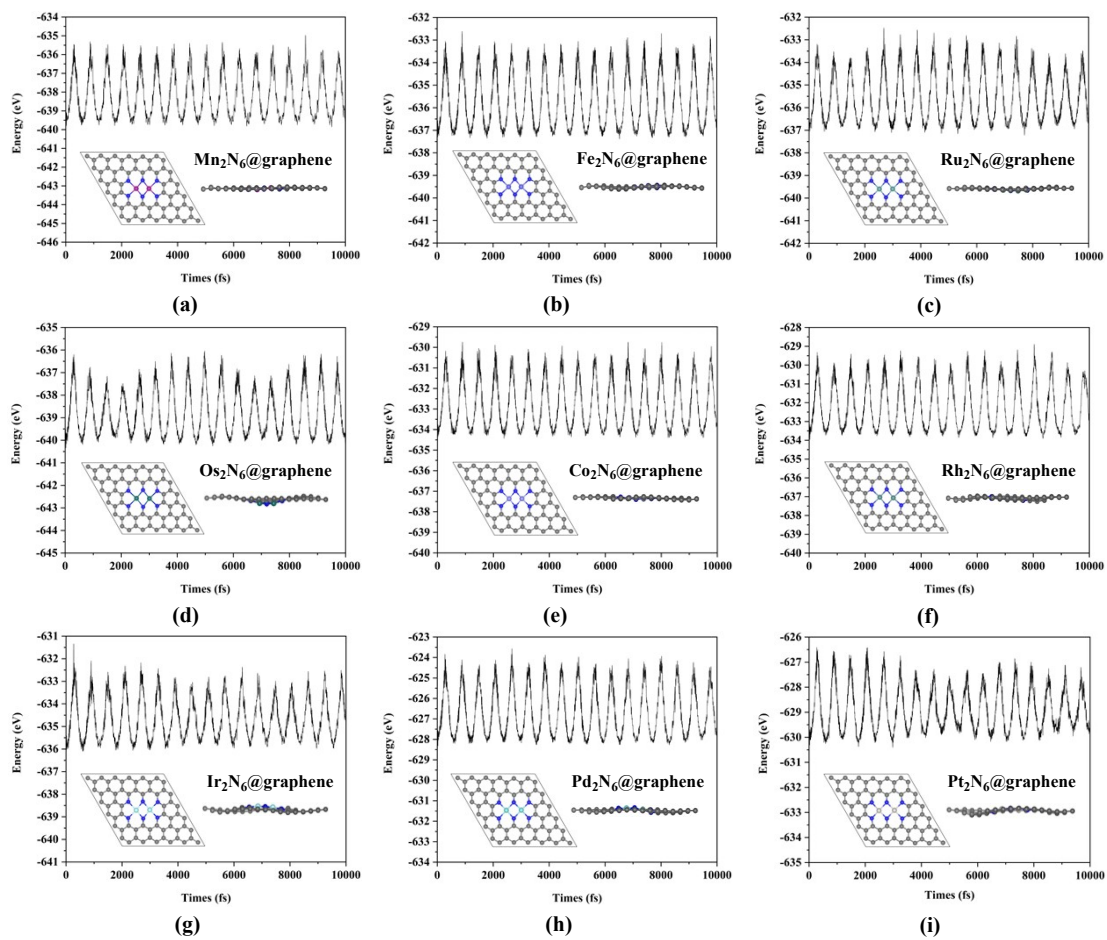

**Fig. S17** Evolution of the total energy of 9  $\text{TM}_2\text{N}_6@graphene$  at 300 K, and the total times duration 10 ps. Snapshots of structures at the end of AIMD simulations are also shown.

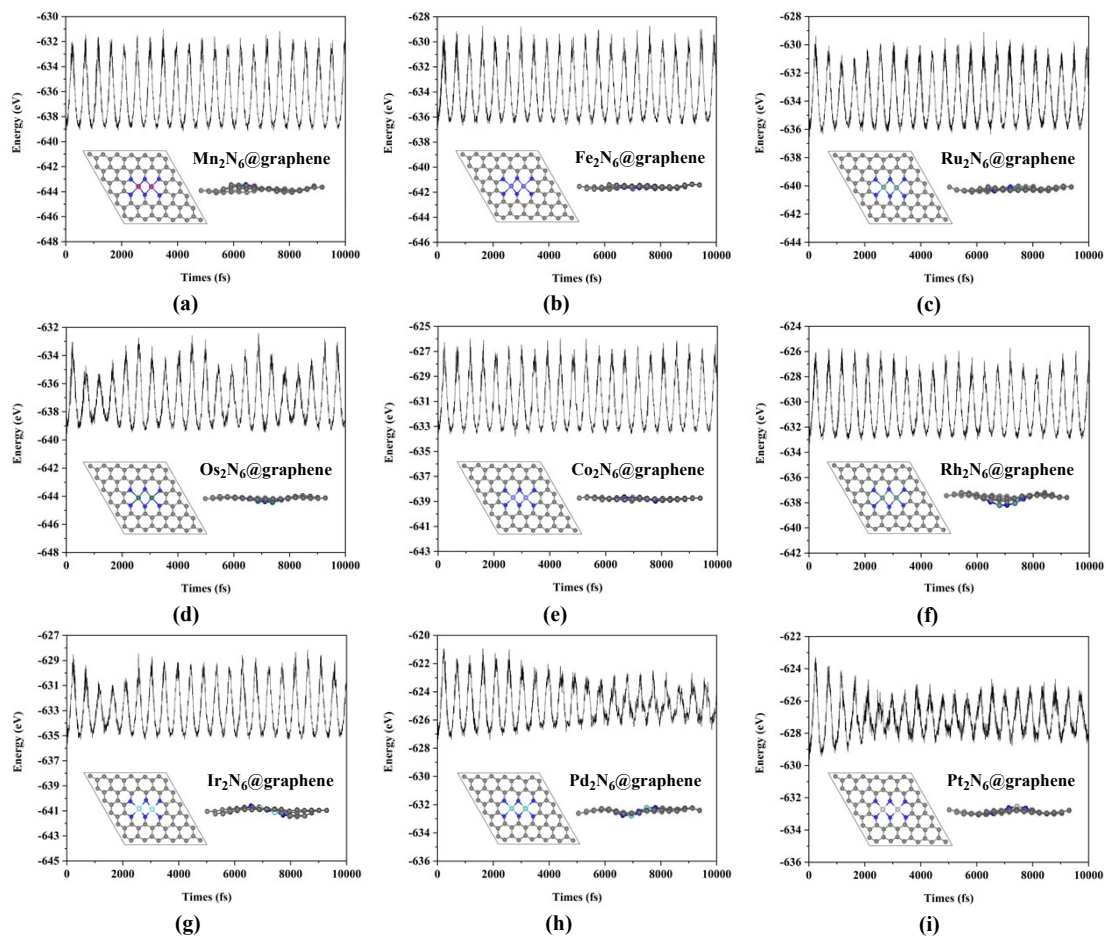

**Fig. S18** Evolution of the total energy of 9  $\text{TM}_2\text{N}_6@graphene$  at 500 K, and the total times duration 10 ps. Snapshots of structures at the end of AIMD simulations are also shown.
